# Supplementary material
Source: MDPI journal article supplement (https://www.mdpi.com/2077-0472/12/3/330)
Supplement: s1 [file s1]

**Table S1. qPCR primers and conditions.**

| Primer name      | Primer sequence (5'-3') | Target gene                | Thermal profile                                                                                                                                | Reference             |
|------------------|-------------------------|----------------------------|------------------------------------------------------------------------------------------------------------------------------------------------|-----------------------|
| <b>R3cd</b>      | GASTTCGGRTGSGTCTTGA     | Bacterial <i>nirS</i> gene | 95°C, 3.0min; 40×(95°C, 10s; 58°C, 30s; 72°C, 30s, 80°C, 5s with plate read); Melt curve 75.0°C to 95.0°C, increment 0.5°C, 0:05s + plate read | Throbäck et al., 2004 |
| <b>cd3aF</b>     | GTSAACG TSAAGGARACSGG   |                            |                                                                                                                                                |                       |
| <b>nosZ-F</b>    | CGYTGTTCMTCGACAGCCAG    | Bacterial <i>nosZ</i> gene | 95°C, 3.0min; 40×(95°C, 10s; 62°C, 30s; 72°C, 30s, 80°C, 5s with plate read); Melt curve 75.0°C to 95.0°C, increment 0.5°C, 0:05s + plate read | Throbäck et al., 2004 |
| <b>nosZ1622R</b> | CGCRASGGCAASAAGGTSCG    |                            |                                                                                                                                                |                       |
| <b>amoA-F</b>    | STAATGGTCTGGCTTAGACG    | AOA <i>amoA</i> gene       | 95°C, 3.0min; 40×(95°C, 20s; 55°C, 30s; 72°C, 30s with plate read); Melt curve 65.0°C to 95.0°C, increment 0.5°C, 0:05s + plate read           | Francis et al., 2005  |
| <b>amoA-R</b>    | GCGGCCATCCATCTGTATGT    |                            |                                                                                                                                                |                       |
| <b>amoA-1F</b>   | GGGGTTTCTACTGGTGGT      | AOB <i>amoA</i> gene       | 95°C, 3.0min; 40×(95°C, 20s; 55°C, 30s; 72°C, 30s with plate read); Melt curve 65.0°C to 95.0°C, increment 0.5°C, 0:05s + plate read           | Szukics et al., 2012  |
| <b>amoA-2R</b>   | CCCCTCGGGAAAGCCTTCTTC   |                            |                                                                                                                                                |                       |

## References

- Francis CA, Roberts KJ, Beman JM, Santoro AE, Oakley BB (2005) Ubiquity and diversity of ammonia-oxidizing archaea in water columns and sediments of the ocean. *Proc Natl Acad Sci U S A* 102(41): 14683-14688.
- Szukics U, Hackl E, Zechmeister-Boltenstern S, Sessitsch A (2012) Rapid and dissimilar response of ammonia oxidizing archaea and bacteria to nitrogen and water amendment in two temperate forest soils. *Microbiol Res* 167(2): 103-109.
- Throbäck IN, Enwall K, Jarvis A, Hallin S (2004) Reassessing PCR primers targeting *nirS*, *nirK* and *nosZ* genes for community surveys of denitrifying bacteria with DGGE. *FEMS Microbiol Ecol* 49(3): 401-417.

**Table S2. Summary of two-way ANOVA.**

| Dependent variable              | Source          | F value | <i>p</i> value |
|---------------------------------|-----------------|---------|----------------|
| N <sub>2</sub> O                | Water regime    | 110.081 | < 0.001*       |
|                                 | Incubation time | 110.237 | < 0.001*       |
|                                 | Regime × time   | 137.637 | < 0.001*       |
| NH <sub>4</sub> <sup>+</sup> -N | Water regime    | 1.826   | 0.139          |
|                                 | Incubation time | 25.346  | < 0.001*       |
|                                 | Regime × time   | 0.56    | 0.898          |
| NO <sub>3</sub> <sup>-</sup> -N | Water regime    | 2.961   | 0.028*         |
|                                 | Incubation time | 2.531   | 0.052          |
|                                 | Regime × time   | 1.678   | 0.083          |
| AOB <i>amoA</i>                 | Water regime    | 14.667  | < 0.001*       |
|                                 | Incubation time | 73.440  | < 0.001*       |
|                                 | Regime × time   | 3.987   | < 0.001*       |
| AOA <i>amoA</i>                 | Water regime    | 61.085  | < 0.001*       |
|                                 | Incubation time | 66.249  | < 0.001*       |
|                                 | Regime × time   | 22.961  | < 0.001*       |
| <i>nirS</i>                     | Water regime    | 10.159  | < 0.001*       |
|                                 | Incubation time | 17.602  | < 0.001*       |
|                                 | Regime × time   | 3.504   | < 0.001*       |
| <i>nosZ</i>                     | Water regime    | 5.308   | 0.001*         |
|                                 | Incubation time | 10.489  | < 0.001*       |
|                                 | Regime × time   | 2.295   | 0.013*         |

Note: \*, *p* < 0.05, statistically significant.

**Table S3. Physicochemical properties of black soil sample.**

| Physicochemical property        | Value       |
|---------------------------------|-------------|
| pH                              | 7.22        |
| organic matter                  | 26.7 g/kg   |
| total nitrogen                  | 1.47 g/kg   |
| NH <sub>4</sub> <sup>+</sup> -N | 1.12 mg/kg  |
| NO <sub>3</sub> <sup>-</sup> -N | 1.03 mg/kg  |
| total potassium                 | 25.16 g/kg  |
| alkali-hydrolyzed nitrogen      | 151.1 mg/kg |
| available phosphorus            | 51.0 mg/kg  |
| available potassium             | 200.0 mg/kg |

**Table S4. Intergroup difference of relative abundance of microbial functions predicted by FAPROTAX.**

| Table S4 Intergroup difference of relative abundance or microbial functions predicted by FAPROTAX |           |          |          |            |          |            |          |            |         |               |           |              |          |              |          |          |          |            |         |          |       |
|---------------------------------------------------------------------------------------------------|-----------|----------|----------|------------|----------|------------|----------|------------|---------|---------------|-----------|--------------|----------|--------------|----------|----------|----------|------------|---------|----------|-------|
| Function                                                                                          | Corrected | a20-mean | a20-sd   | (%a40-mean | a40-sd   | (%s40-mean | s40-sd   | (%s80-mean | s80-sd  | (%w2_100-mean | w2_100-sd | (%w2_40-mean | w2_40-sd | (%w2_60-mean | w2_60-sd | w40-mean | w40-sd   | (%w80-mean | w80-sd  | (P       | Value |
| chemohet                                                                                          | 0.009581  | 14.46    | 2.185    | 23.35      | 1.41     | 25.53      | 1.244    | 21.95      | 0.4417  | 19.86         | 1.725     | 20.28        | 0.6377   | 23.59        | 0.3804   | 22.44    | 0.7614   | 22.54      | 1.026   | 0.004073 |       |
| aerobic_cf                                                                                        | 0.009581  | 13.9     | 2.09     | 21.68      | 1.146    | 23.66      | 1.31     | 19.61      | 0.2307  | 17.92         | 1.627     | 19.44        | 0.6207   | 21.86        | 0.3396   | 21.52    | 0.9318   | 20.31      | 1.083   | 0.003944 |       |
| animal_pa                                                                                         | 0.009252  | 15.15    | 1.064    | 9.541      | 0.8333   | 7.711      | 0.8365   | 6.805      | 0.1714  | 7.652         | 0.5111    | 11.64        | 0.387    | 8.855        | 0.3831   | 9.723    | 0.1502   | 7.317      | 0.2672  | 0.002002 |       |
| human_pe                                                                                          | 0.009252  | 14.6     | 1.309    | 9.226      | 0.8571   | 7.285      | 0.843    | 6.567      | 0.1157  | 7.361         | 0.4961    | 11.25        | 0.4089   | 8.072        | 0.4795   | 9.402    | 0.2393   | 7.045      | 0.2273  | 0.002427 |       |
| human_pe                                                                                          | 0.009252  | 14.45    | 1.415    | 8.677      | 0.5355   | 7.146      | 0.9383   | 6.546      | 0.1066  | 7.332         | 0.4918    | 11.16        | 0.4311   | 8.027        | 0.4872   | 9.371    | 0.2468   | 7.031      | 0.2224  | 0.002387 |       |
| ureolysis                                                                                         | 0.009252  | 13.89    | 0.9924   | 5.084      | 0.08034  | 4.237      | 0.4306   | 3.398      | 0.1789  | 3.005         | 0.3207    | 9.416        | 0.1269   | 5.101        | 0.3478   | 7.454    | 0.3638   | 3.073      | 0.2113  | 0.001376 |       |
| nitrificatio                                                                                      | 0.009252  | 2.318    | 0.3339   | 3.718      | 0.7367   | 4.709      | 0.4616   | 7.431      | 0.6128  | 8.048         | 0.2388    | 2.845        | 0.2587   | 4.702        | 0.4769   | 3.162    | 0.5986   | 6.705      | 0.5439  | 0.001883 |       |
| aerobic_ar                                                                                        | 0.009252  | 1.311    | 0.04065  | 2.409      | 0.3028   | 2.745      | 0.2711   | 5.681      | 0.3122  | 5.593         | 0.2148    | 1.643        | 0.2151   | 3.094        | 0.28     | 1.583    | 0.05274  | 4.393      | 0.2903  | 0.001558 |       |
| respirator                                                                                        | 0.009252  | 0.9716   | 0.101    | 1.63       | 0.3208   | 2.479      | 0.2366   | 2.742      | 0.1627  | 3.499         | 0.4419    | 1.465        | 0.1307   | 1.805        | 0.2186   | 1.945    | 0.1349   | 2.718      | 0.1313  | 0.002497 |       |
| sulfur_res                                                                                        | 0.009252  | 0.9527   | 0.09063  | 1.623      | 0.3218   | 2.468      | 0.2265   | 2.739      | 0.1631  | 3.486         | 0.4431    | 1.465        | 0.1307   | 1.782        | 0.2176   | 1.935    | 0.1426   | 2.703      | 0.1368  | 0.002559 |       |
| aerobic_ni                                                                                        | 0.02708   | 1.007    | 0.3346   | 1.308      | 0.4979   | 1.964      | 0.2658   | 1.75       | 0.3026  | 2.455         | 0.4495    | 1.203        | 0.1417   | 1.608        | 0.2171   | 1.578    | 0.5729   | 2.311      | 0.2882  | 0.01713  |       |
| nitrate_red                                                                                       | 0.2699    | 1.303    | 0.2937   | 1.116      | 0.2195   | 1.168      | 0.3242   | 1.714      | 0.07748 | 1.312         | 0.3237    | 1.279        | 0.1196   | 1.136        | 0.1241   | 1.351    | 0.22     | 1.263      | 0.09459 | 0.2038   |       |
| aromatic_c                                                                                        | 0.009561  | 0.4551   | 0.262    | 1.459      | 0.2744   | 2.07       | 0.646    | 0.4264     | 0.1223  | 0.4306        | 0.0428    | 1.21         | 0.258    | 1.39         | 0.2179   | 2.624    | 0.2477   | 0.6845     | 0.2506  | 0.003317 |       |
| chitinolysis                                                                                      | 0.009252  | 0.2933   | 0.05092  | 1.428      | 0.1065   | 1.861      | 0.2992   | 0.8469     | 0.1416  | 1.65          | 0.1527    | 0.6981       | 0.246    | 1.628        | 0.2393   | 0.4155   | 0.1214   | 1.396      | 0.1177  | 0.002832 |       |
| fermentati                                                                                        | 0.01432   | 0.6215   | 0.1091   | 1.858      | 0.8821   | 0.8173     | 0.2888   | 1.318      | 0.1783  | 0.7829        | 0.07441   | 0.7494       | 0.1651   | 0.7174       | 0.1613   | 1.109    | 0.1392   | 1.005      | 0.08652 | 0.008183 |       |
| nitrogen_f                                                                                        | 0.1382    | 0.384    | 0.08541  | 0.9033     | 0.102    | 0.5456     | 0.1956   | 0.6627     | 0.115   | 0.6659        | 0.06505   | 0.6342       | 0.1727   | 0.6794       | 0.2705   | 0.6381   | 0.08853  | 0.5771     | 0.08373 | 0.1016   |       |
| cellulolysis                                                                                      | 0.009407  | 0.2113   | 0.06964  | 0.6822     | 0.1955   | 0.4099     | 0.05596  | 1.389      | 0.1302  | 0.6326        | 0.1714    | 0.3248       | 0.05968  | 0.4304       | 0.1081   | 0.4133   | 0.04163  | 1.084      | 0.1763  | 0.003072 |       |
| invertebra                                                                                        | 0.07116   | 0.5481   | 0.2449   | 0.3153     | 0.1258   | 0.4258     | 0.1005   | 0.2382     | 0.05749 | 0.2902        | 0.05634   | 0.3831       | 0.03558  | 0.7826       | 0.1064   | 0.3207   | 0.0995   | 0.2726     | 0.04748 | 0.04938  |       |
| predatory                                                                                         | 0.01041   | 0.1369   | 0.02836  | 0.1708     | 0.008274 | 0.2321     | 0.09311  | 0.5399     | 0.06944 | 0.6382        | 0.1412    | 0.1542       | 0.0147   | 0.3438       | 0.07985  | 0.2569   | 0.1038   | 0.8886     | 0.2172  | 0.005345 |       |
| phototrop                                                                                         | 0.009581  | 0.1066   | 0.03232  | 0.346      | 0.09559  | 0.1292     | 0.03402  | 0.5429     | 0.1476  | 0.6149        | 0.1474    | 0.1125       | 0.04486  | 0.4673       | 0.0482   | 0.1662   | 0.008974 | 0.7093     | 0.2356  | 0.003538 |       |
| photoautot                                                                                        | 0.009581  | 0.08981  | 0.02962  | 0.3273     | 0.08833  | 0.1292     | 0.03402  | 0.5327     | 0.1378  | 0.594         | 0.1584    | 0.1096       | 0.04597  | 0.4472       | 0.05354  | 0.14     | 0.01626  | 0.7066     | 0.2379  | 0.004106 |       |
| plant_path                                                                                        | 0.02708   | 0.5082   | 0.27     | 0.2541     | 0.1278   | 0.3668     | 0.1112   | 0.1857     | 0.06084 | 0.1205        | 0.02496   | 0.3582       | 0.09658  | 0.8086       | 0.08365  | 0.2874   | 0.09686  | 0.1754     | 0.05535 | 0.01675  |       |
| nitrate_red                                                                                       | 0.02859   | 0.2847   | 0.009306 | 0.2579     | 0.08529  | 0.2258     | 0.06118  | 0.5426     | 0.0767  | 0.4927        | 0.07057   | 0.2571       | 0.05647  | 0.2276       | 0.07874  | 0.2538   | 0.07547  | 0.4072     | 0.08098 | 0.01926  |       |
| nitrogen_r                                                                                        | 0.02859   | 0.2847   | 0.009306 | 0.2579     | 0.08529  | 0.2258     | 0.06118  | 0.5426     | 0.0767  | 0.4927        | 0.07057   | 0.2571       | 0.05647  | 0.2276       | 0.07874  | 0.2538   | 0.07547  | 0.4072     | 0.08098 | 0.01926  |       |
| nitrite_red                                                                                       | 0.02554   | 0.2847   | 0.009306 | 0.2519     | 0.09549  | 0.2057     | 0.06751  | 0.5401     | 0.07426 | 0.4927        | 0.07057   | 0.2571       | 0.05647  | 0.2276       | 0.07874  | 0.248    | 0.06914  | 0.4072     | 0.08098 | 0.01512  |       |
| cyanobact                                                                                         | 0.009252  | 0.03463  | 0.02256  | 0.2738     | 0.06104  | 0.1089     | 0.01103  | 0.4662     | 0.1739  | 0.5483        | 0.1553    | 0.04846      | 0.005249 | 0.4007       | 0.02969  | 0.1039   | 0.01609  | 0.654      | 0.21    | 0.002528 |       |
| oxygenic_i                                                                                        | 0.009252  | 0.03463  | 0.02256  | 0.2738     | 0.06104  | 0.1089     | 0.01103  | 0.4662     | 0.1739  | 0.5483        | 0.1553    | 0.04846      | 0.005249 | 0.4007       | 0.02969  | 0.1039   | 0.01609  | 0.654      | 0.21    | 0.002528 |       |
| manganese                                                                                         | 0.138     | 0.2373   | 0.02116  | 0.2565     | 0.0377   | 0.2397     | 0.1264   | 0.4921     | 0.09967 | 0.2377        | 0.03258   | 0.1451       | 0.08671  | 0.2583       | 0.05192  | 0.3016   | 0.05685  | 0.2346     | 0.03348 | 0.09858  |       |
| intracellular                                                                                     | 0.009838  | 0.1239   | 0.02172  | 0.1349     | 0.04866  | 0.2084     | 0.07167  | 0.2759     | 0.06847 | 0.4944        | 0.08604   | 0.1006       | 0.03304  | 0.1893       | 0.07553  | 0.09559  | 0.0463   | 0.436      | 0.08504 | 0.004819 |       |
| methylotr                                                                                         | 0.009838  | 0.1102   | 0.007786 | 0.2003     | 0.04254  | 0.09792    | 0.02828  | 0.3348     | 0.07134 | 0.2953        | 0.06907   | 0.1427       | 0.01642  | 0.09678      | 0.06248  | 0.0914   | 0.01207  | 0.2509     | 0.07518 | 0.0048   |       |
| methanol                                                                                          | 0.009838  | 0.1102   | 0.007786 | 0.2003     | 0.04254  | 0.09792    | 0.02828  | 0.3348     | 0.07134 | 0.2953        | 0.06907   | 0.1427       | 0.01642  | 0.09678      | 0.06248  | 0.0914   | 0.01207  | 0.2509     | 0.07518 | 0.0048   |       |
| dark_hydr                                                                                         | 0.01289   | 0.07004  | 0.0193   | 0.05946    | 0.03663  | 0.03576    | 0.009885 | 0.3178     | 0.01148 | 0.2988        | 0.02054   | 0.06317      | 0.01621  | 0.025        | 0.003978 | 0.05334  | 0.04433  | 0.1683     | 0.03346 | 0.007105 |       |
| nitrite_red                                                                                       | 0.3194    | 0.1234   | 0.02588  | 0.1091     | 0.05543  | 0.05611    | 0.03312  | 0.08147    | 0.05279 | 0.05252       | 0.02261   | 0.1243       | 0.05856  | 0.07146      | 0.02656  | 0.0895   | 0.04359  | 0.08179    | 0.02998 | 0.2673   |       |
| nitrous_ox                                                                                        | 0.3194    | 0.1234   | 0.02588  | 0.1091     | 0.05543  | 0.05611    | 0.03312  | 0.08147    | 0.05279 | 0.05252       | 0.02261   | 0.1243       | 0.05856  | 0.07146      | 0.02656  | 0.0895   | 0.04359  | 0.08179    | 0.02998 | 0.2673   |       |
| nitrate_der                                                                                       | 0.3194    | 0.1234   | 0.02588  | 0.1091     | 0.05543  | 0.05611    | 0.03312  | 0.08147    | 0.05279 | 0.05252       | 0.02261   | 0.1243       | 0.05856  | 0.07146      | 0.02656  | 0.0895   | 0.04359  | 0.08179    | 0.02998 | 0.2673   |       |
| denitrifica                                                                                       | 0.3194    | 0.1234   | 0.02588  | 0.1091     | 0.05543  | 0.05611    | 0.03312  | 0.08147    | 0.05279 | 0.05252       | 0.02261   | 0.1243       | 0.05856  | 0.07146      | 0.02656  | 0.0895   | 0.04359  | 0.08179    | 0.02998 | 0.2673   |       |
| iron_respi                                                                                        | 0.01041   | 0.006152 | 0.005523 | 0.01399    | 0.01266  | 0          | 0        | 0.3061     | 0.02113 | 0.2919        | 0.0185    | 0            | 0        | 0.0107       | 0.01296  | 0.003748 | 0.006492 | 0.1418     | 0.04403 | 0.005525 |       |
| knallgas_b                                                                                        | 0.009252  | 0.001781 | 0.003084 | 0.003851   | 0.006671 | 0          | 0        | 0.3028     | 0.0242  | 0.2919        | 0.0185    | 0            | 0        | 0            | 0        | 0        | 0        | 0.1391     | 0.04829 | 0.002811 |       |
| fumarate                                                                                          | 0.009252  | 0.001781 | 0.003084 | 0.003851   | 0.006671 | 0          | 0        | 0.3028     | 0.0242  | 0.2919        | 0.0185    | 0            | 0        | 0            | 0        | 0        | 0        | 0.1391     | 0.04829 | 0.002811 |       |
| nitrate_ar                                                                                        | 0.009252  | 0.001781 | 0.003084 | 0.003851   | 0.006671 | 0          | 0        | 0.3028     | 0.0242  | 0.2919        | 0.0185    | 0            | 0        | 0            | 0        | 0        | 0        | 0.1391     | 0.04829 | 0.002811 |       |
| nitrite_ar                                                                                        | 0.009252  | 0.001781 | 0.003084 | 0.003851   | 0.006671 | 0          | 0        | 0.3028     | 0.0242  | 0.2919        | 0.0185    | 0            | 0        | 0            | 0        | 0        | 0        | 0.1391     | 0.04829 | 0.002811 |       |
| photohete                                                                                         | 0.5411    | 0.072    | 0.02517  | 0.07219    | 0.04554  | 0.02035    | 0.02409  | 0.07666    | 0.03116 | 0.06661       | 0.02699   | 0.06405      | 0.0417   | 0.06664      | 0.01856  | 0.06229  | 0.02403  | 0.05533    | 0.02709 | 0.519    |       |
| anoxxygeni                                                                                        | 0.7422    | 0.05518  | 0.01397  | 0.05354    | 0.03188  | 0.02035    | 0.02409  | 0.0665     | 0.04112 | 0.04571       | 0.0283    | 0.06117      | 0.04236  | 0.04646      | 0.02392  | 0.03617  | 0.003409 | 0.05257    | 0.02835 | 0.7422   |       |
| anoxxygeni                                                                                        | 0.7422    | 0.05518  | 0.01397  | 0.05354    | 0.03188  | 0.02035    | 0.02409  | 0.0665     | 0.04112 | 0.04571       | 0.0283    | 0.06117      | 0.04236  | 0.04646      | 0.02392  | 0.03617  | 0.003409 | 0.05257    | 0.02835 | 0.7422   |       |
| sulfate_res                                                                                       | 0.3287    | 0.01892  | 0.012    | 0.006589   | 0.005946 | 0.010      |          |            |         |               |           |              |          |              |          |          |          |            |         |          |       |

(A)

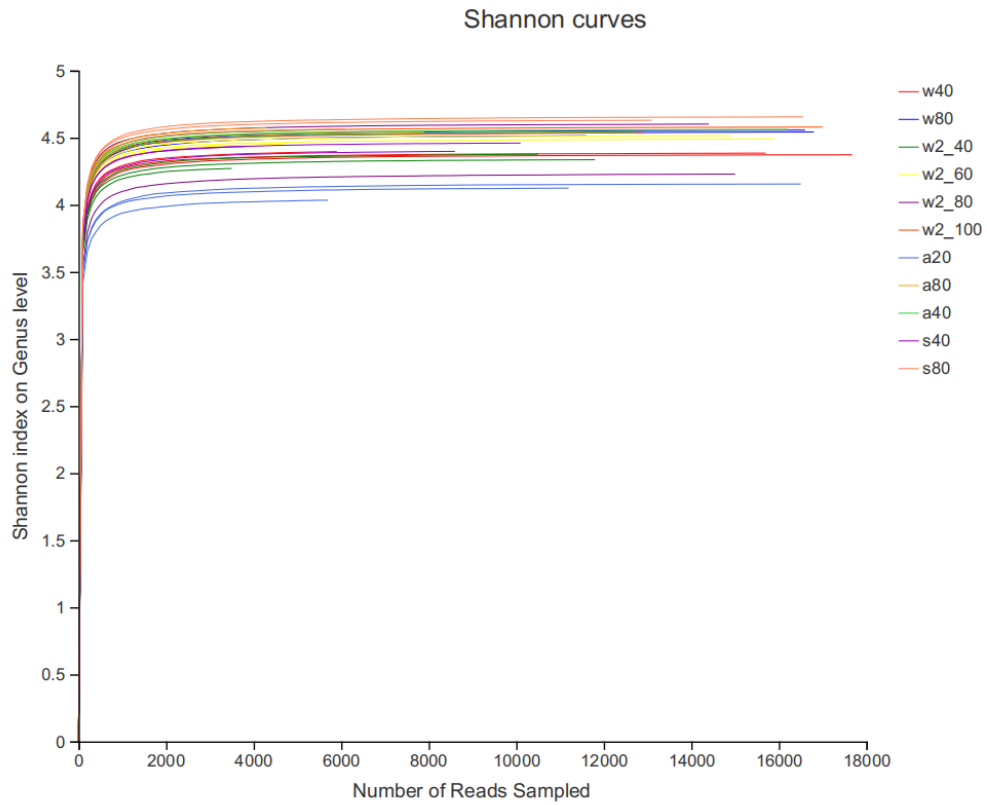

(B)

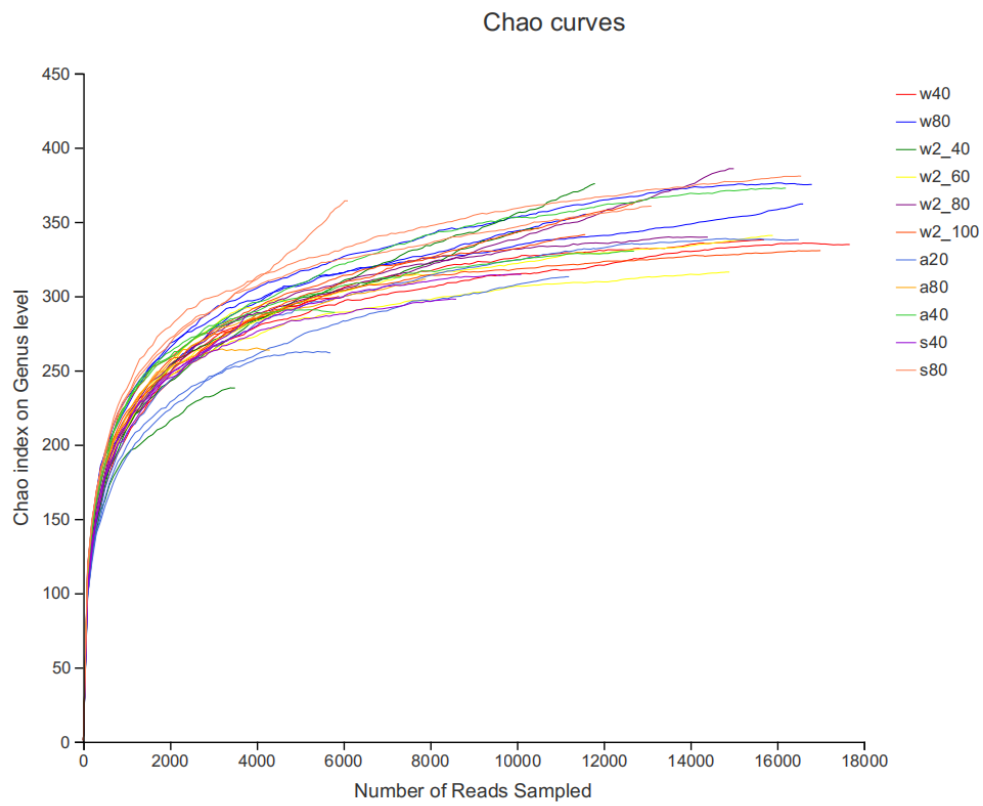

**Figure S1. (A): rarefac,Shannon. (B): rarefac,Chao.**

(A)

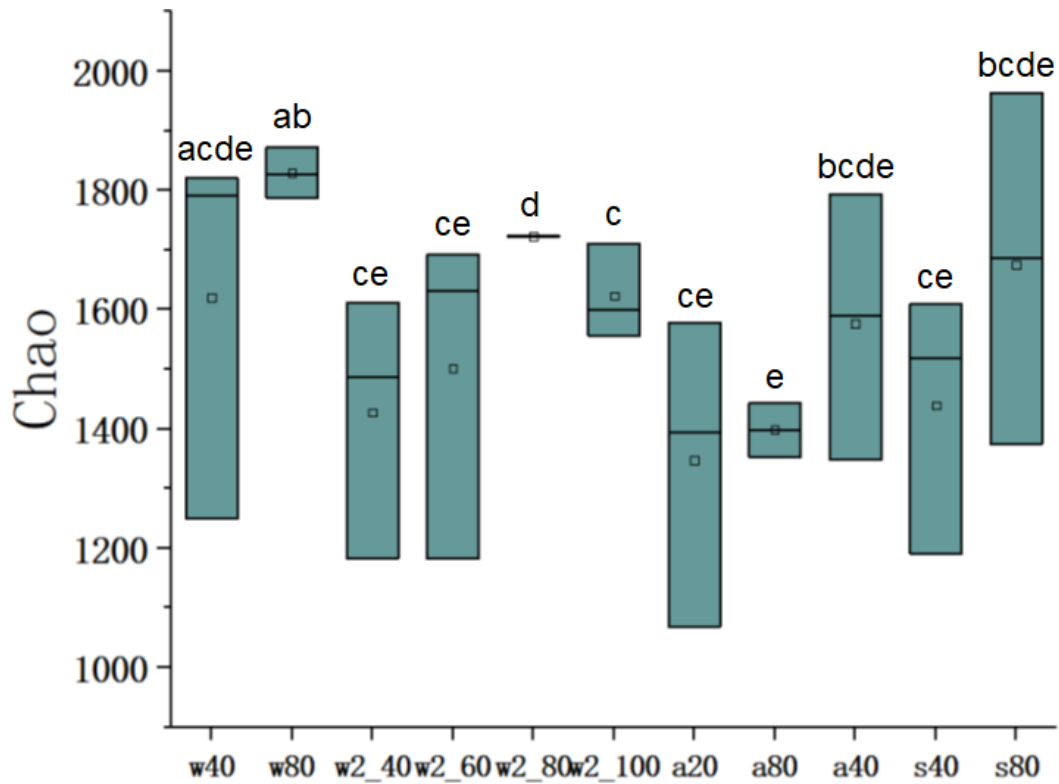

(B)

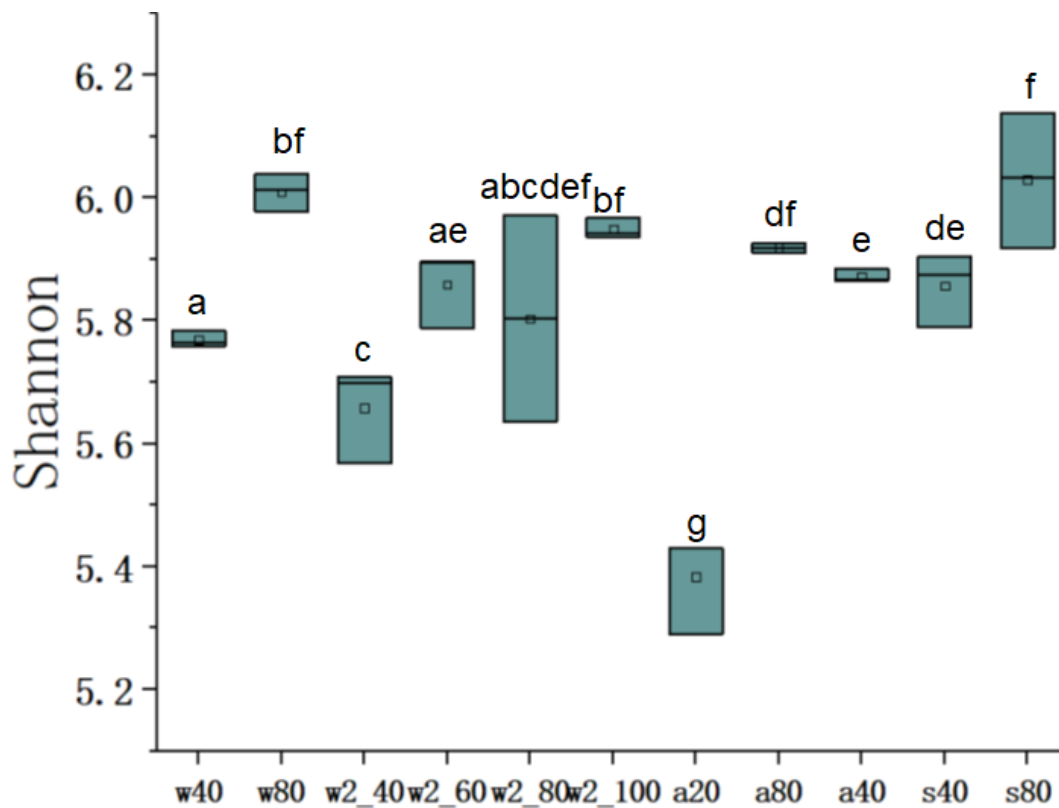

**Figure S2. (A): Chao box plot. (B): Shannon box plot.**





C

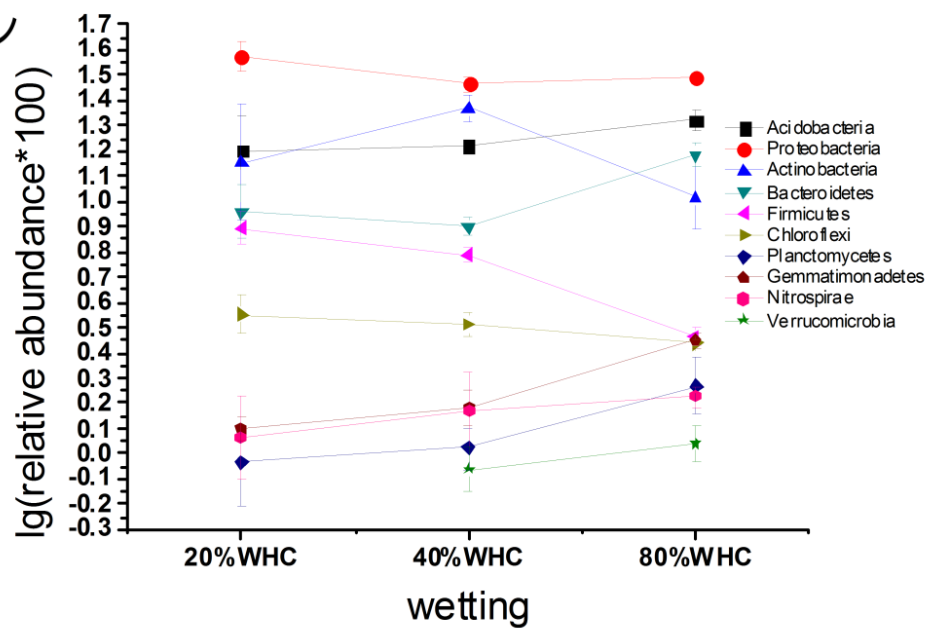

D

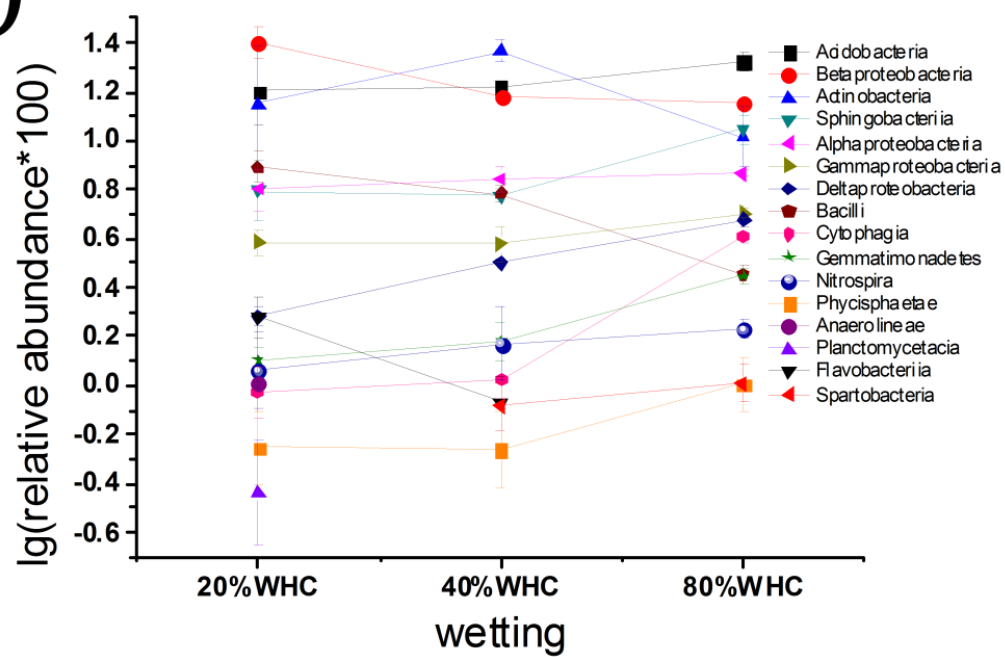

E

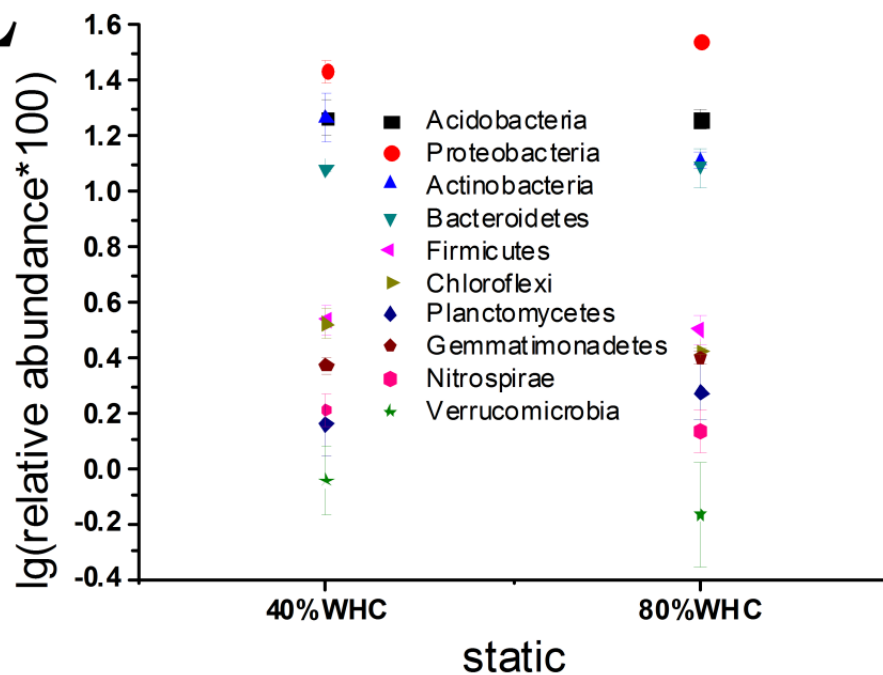

F

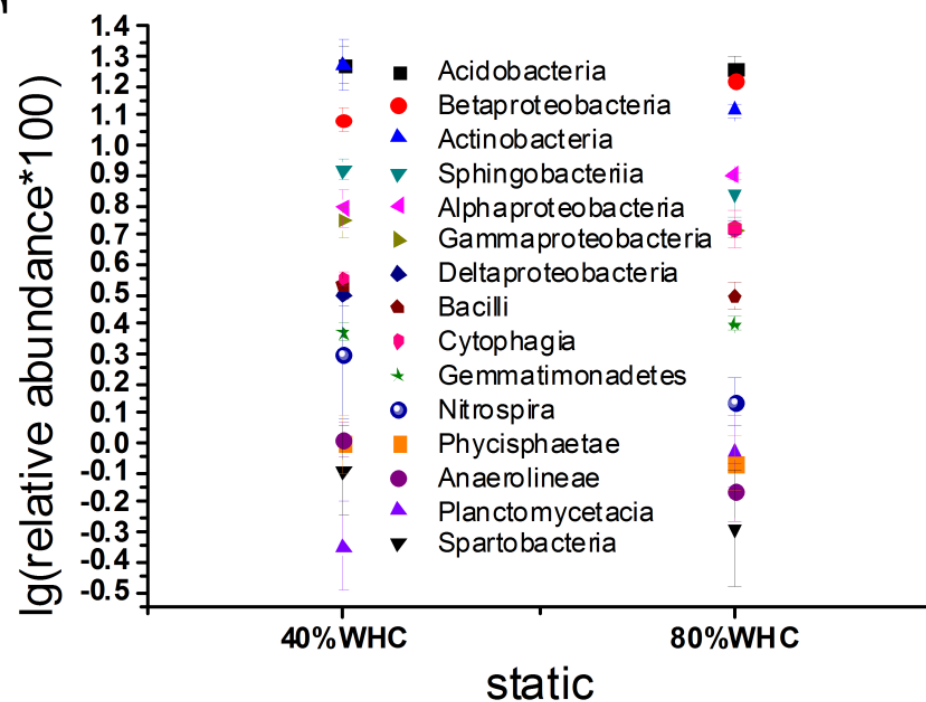



## G

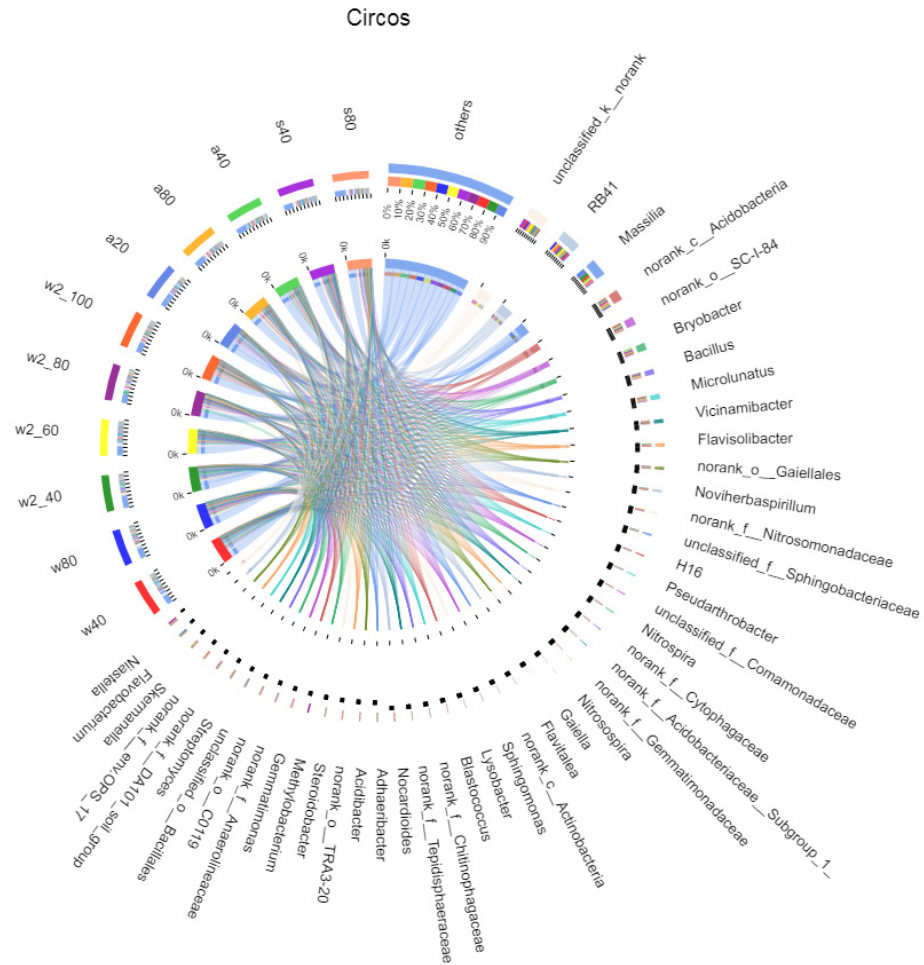

**Figure S3. (A): Venn,4 regime,OUT. (B): circos,class level,11 sample group. (C): phyla,wetting. (D): class,wetting. (E): static,phyla. (F): class,static. (G): genus,circos,11 sample group.**

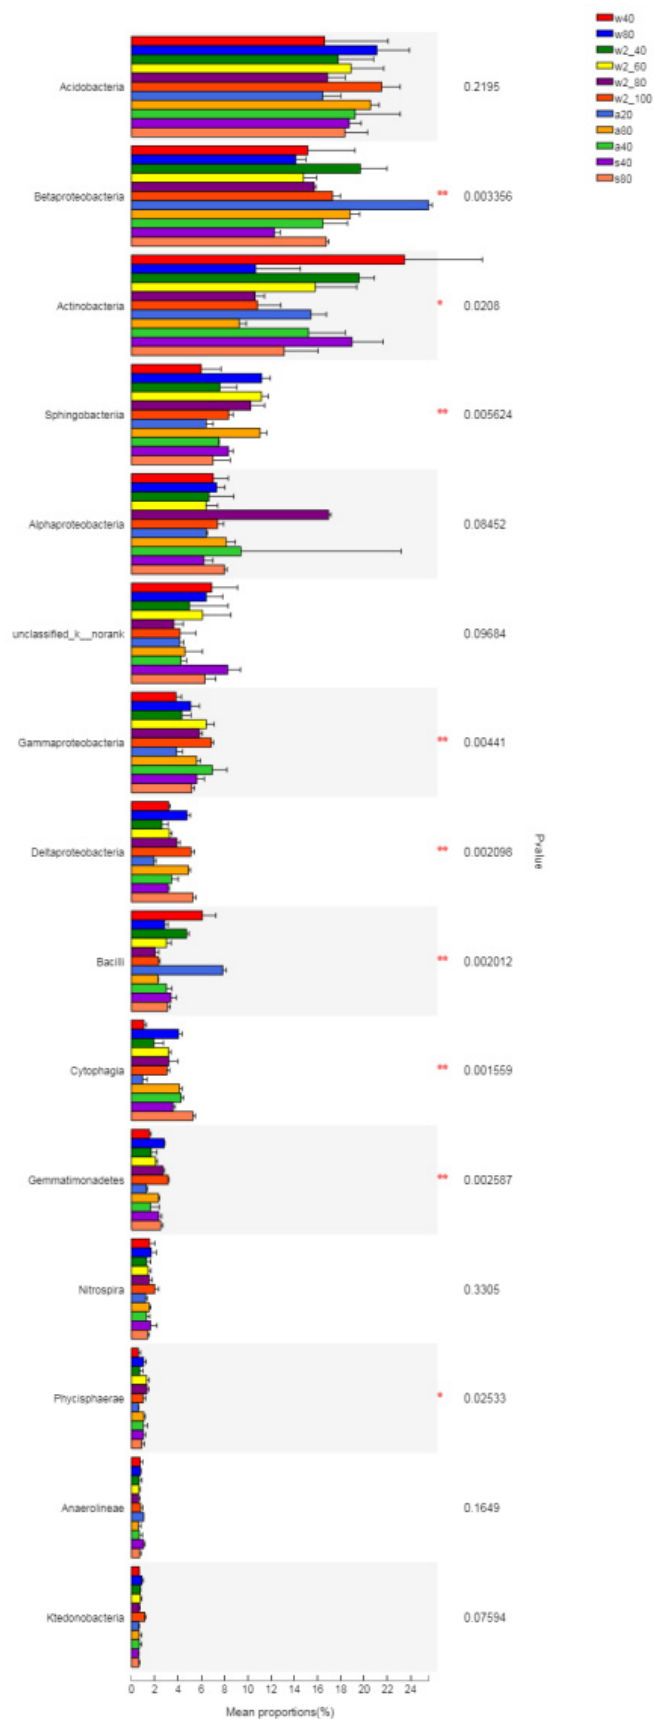

**Figure S4. rank sum,11 group,class level.**

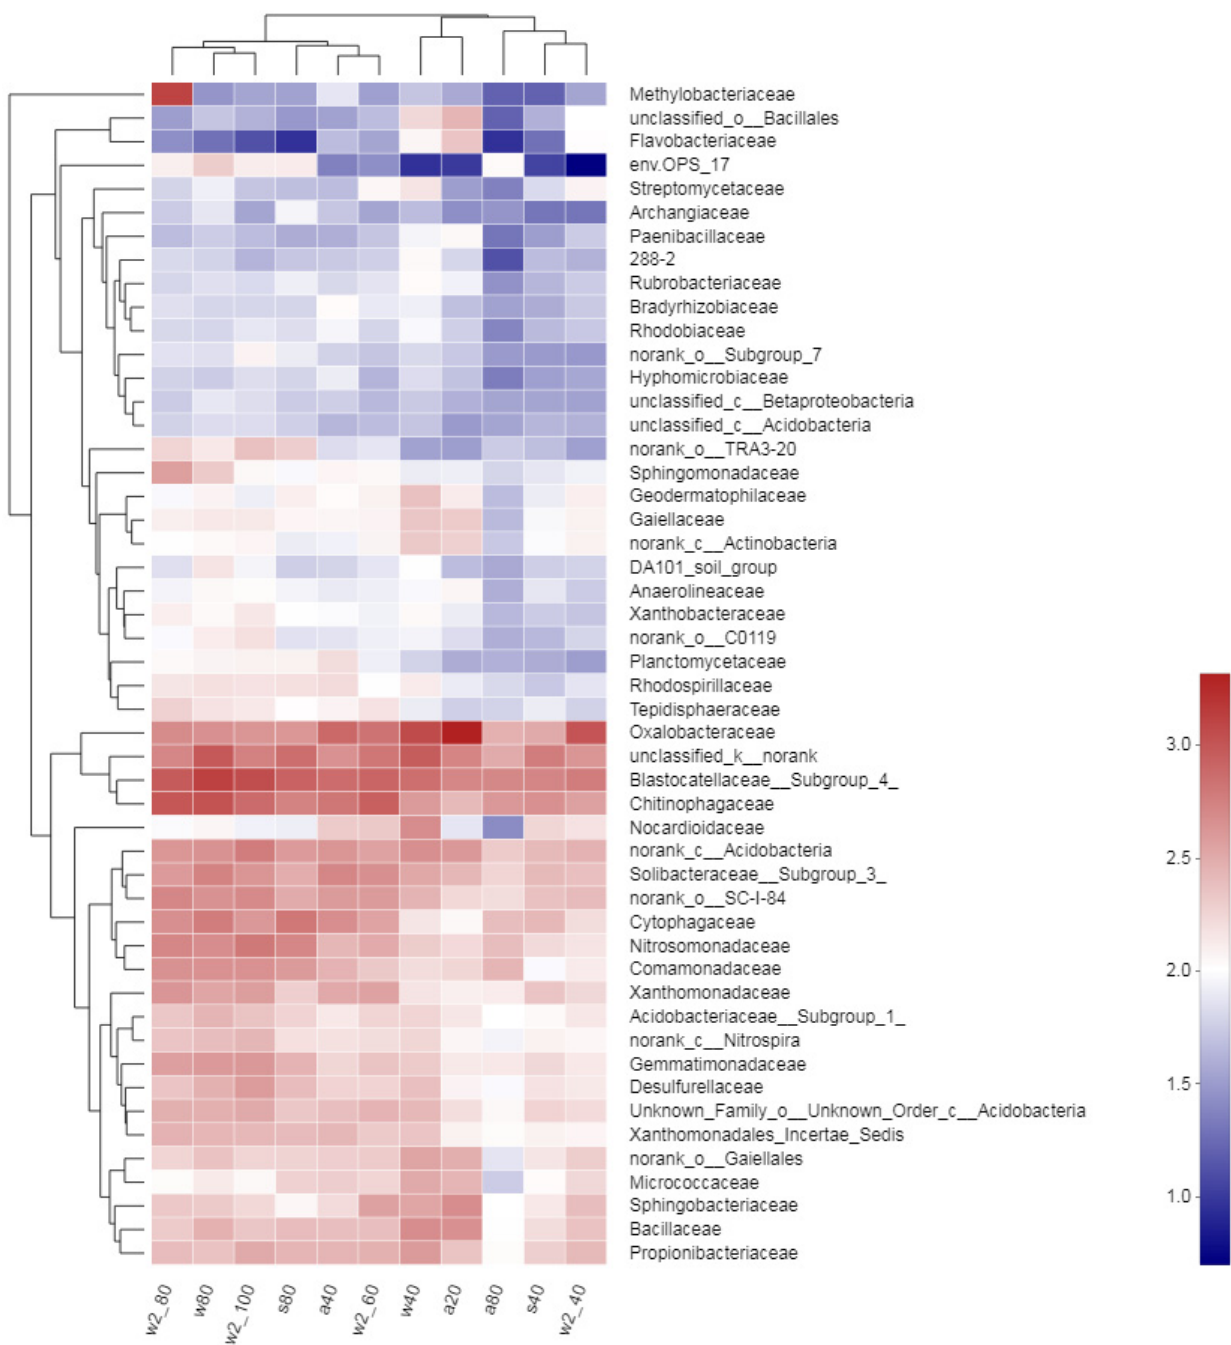

**Figure S5. 50 families,11 sample group,heatmap.**

(A)

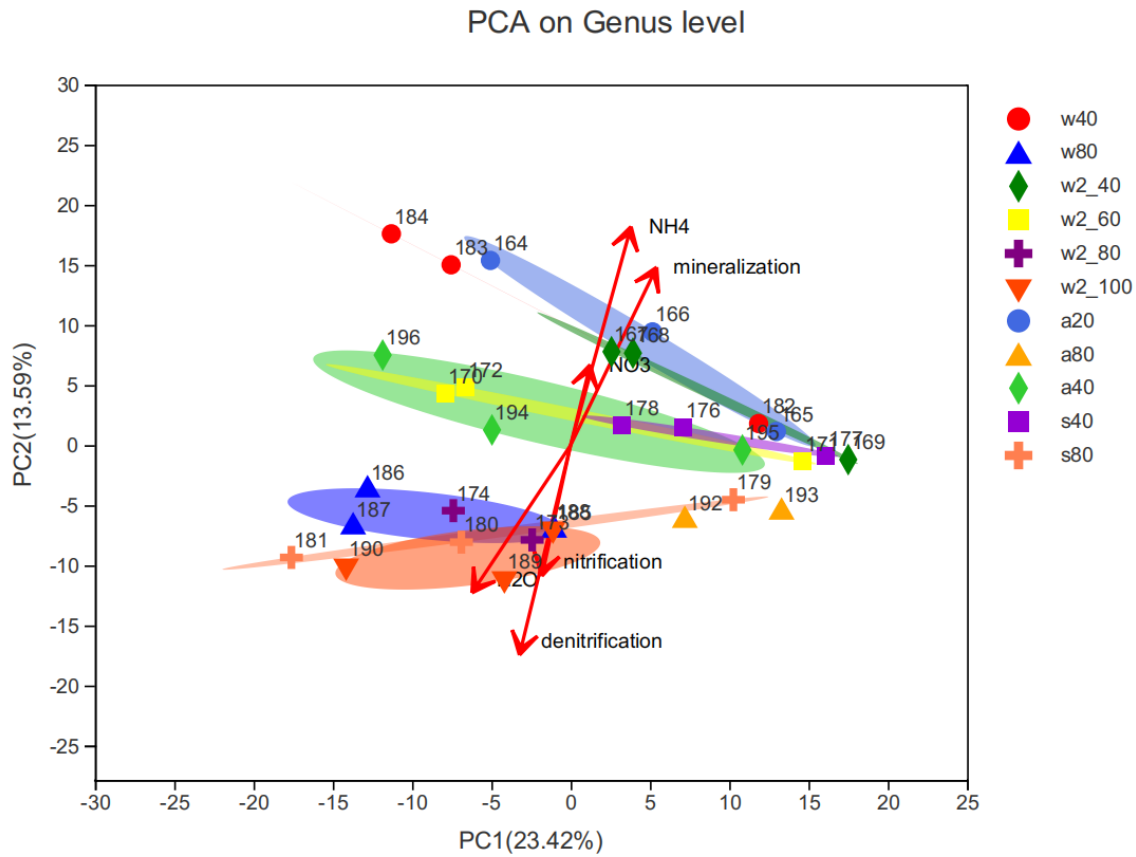

(B)

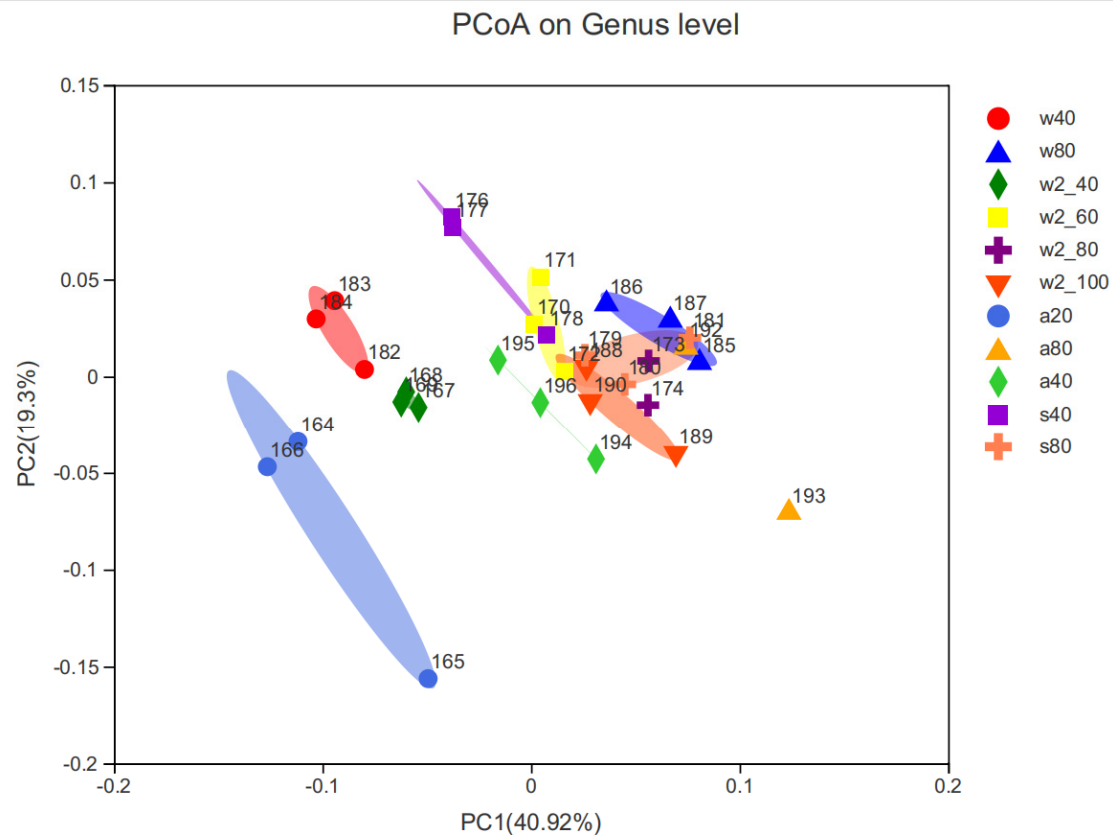

**Figure S6. (A): PCA,genus level. (B): PCoA,genus level.**

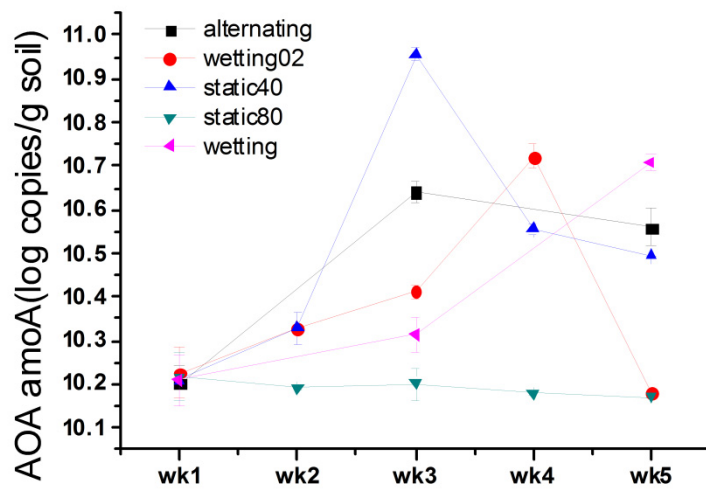

**Figure S7. AOA amoA.**

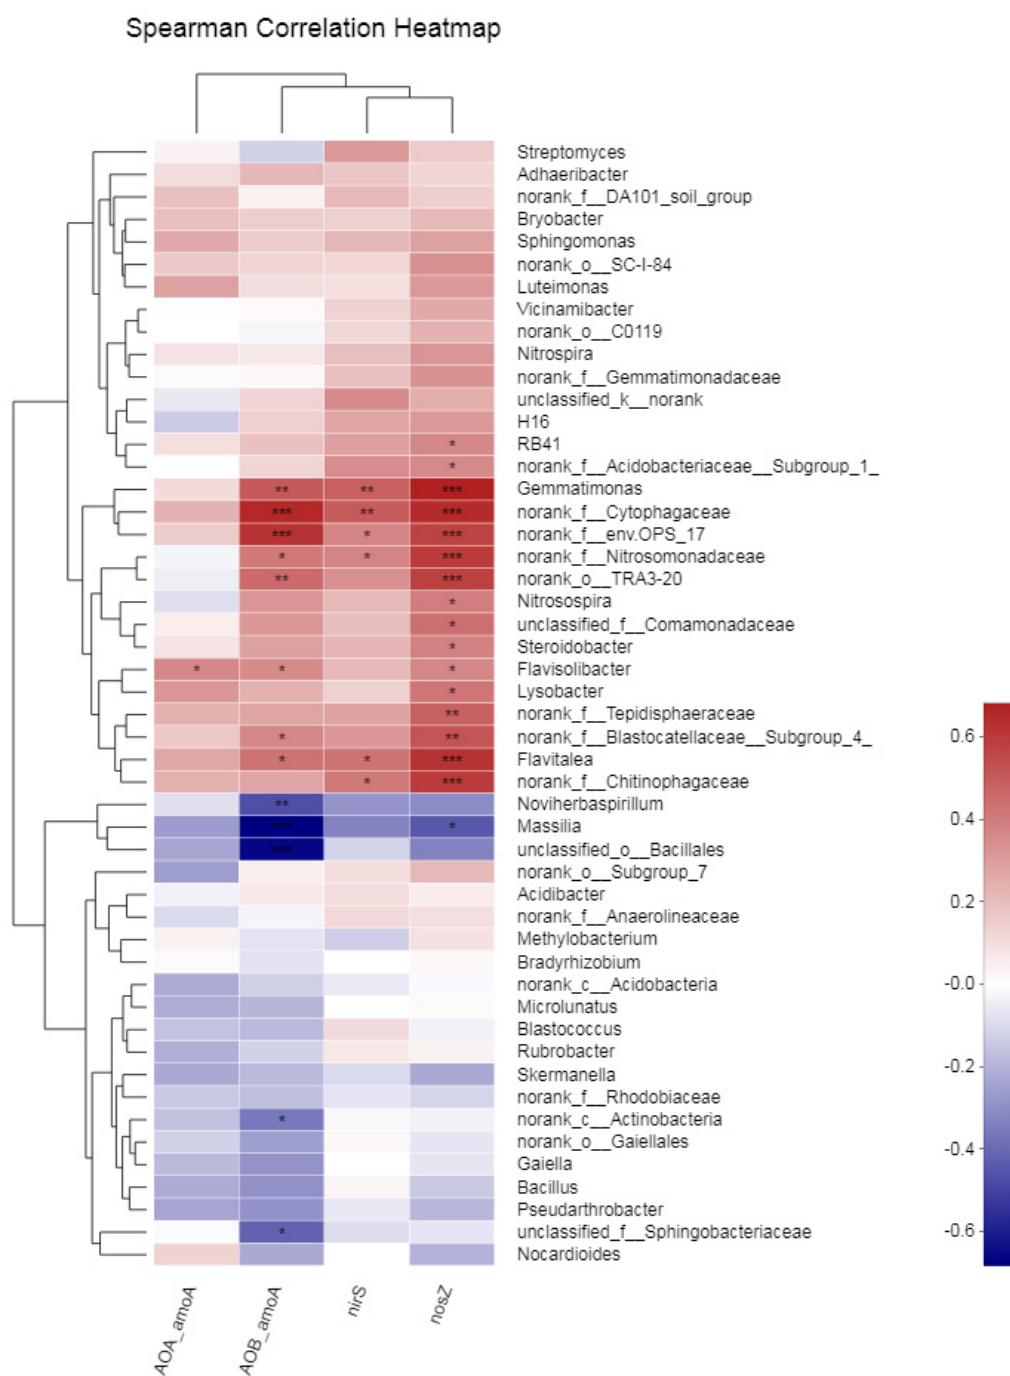

**Figure S8. Spearman,4 gene.**
